# Supplementary material for: Parametric Sensitivity and Constraint of Contrail Cirrus Radiative Forcing in the Atmospheric Component of CNRM-CM6-1
Source: Copernicus journal article supplement (doi:10.5194/egusphere-2023-2478), 2023-11-14
Supplement: Supplementary file 1 [file egusphere-2023-2478-supplement.pdf]

# Supporting Information for "Parametric Sensitivity and Constraint of contrail radiative Forcing in the Atmospheric Component of CNRM-CM6-1"

M. Perini<sup>1</sup>, L. Terray<sup>1</sup>, S. Peatier<sup>1</sup>, D. Cariolle<sup>1</sup>, M.P. Moine<sup>1</sup>

<sup>1</sup>CERFACS, Toulouse, France

## Contents of this file

1. Tables S1
2. Figures S1 to S3

## References

- Collins, M., Booth, B. B., Harris, G. R., Murphy, J. M., Sexton, D. M., & Webb, M. J. (2006). Towards quantifying uncertainty in transient climate change. *Climate dynamics*, *27*, 127–147.
- Sexton, D. M., McSweeney, C. F., Rostron, J. W., Yamazaki, K., Booth, B. B., Murphy, J. M., ... Karmalkar, A. V. (2021). A perturbed parameter ensemble of hadgem3-gc3. 05 coupled model projections: part 1: selecting the parameter combinations. *Climate Dynamics*, *56*(11-12), 3395–3436.

**Table S1.** Description of the parameters perturbed in our PPE

| Name        | Minimum               | Maximum              | Reference             | Description                                                                          | Units        |
|-------------|-----------------------|----------------------|-----------------------|--------------------------------------------------------------------------------------|--------------|
| AGRE1       | 0                     | 10                   | 5.5                   | Parameter in the boundary-layer-top entrainment parameterization                     | -            |
| RAUTEFS     | $0.5 \times 10^{-3}$  | $10^{-2}$            | $5.2 \times 10^{-3}$  | Inverse timescale for ice autoconversion                                             | $s^{-1}$     |
| RQICRMIN    | $0.1 \times 10^{-7}$  | $0.1 \times 10^{-5}$ | $0.1 \times 10^{-6}$  | Critical ice content for ice autoconversion at low negative temperature              | $kg.kg^{-1}$ |
| RQICRMAX    | $0.05 \times 10^{-4}$ | $1 \times 10^{-4}$   | $0.21 \times 10^{-4}$ | Critical ice content for ice autoconversion at high negative temperature             | $kg.kg^{-1}$ |
| TFVI        | 0.001                 | 0.2                  | 0.04                  | Falling speed of cloud ice crystals                                                  | $m.s^{-1}$   |
| TFVS        | 0.1                   | 6.0                  | 0.6                   | Falling speed of snow                                                                | $m.s^{-1}$   |
| RNINTS      | $10^{-5}$             | $10^{-7}$            | $0.3 \times 10^{-7}$  | Parameter for size distribution of ice crystals                                      | -            |
| RKDX        | $8 \times 10^{-5}$    | $6 \times 10^{-4}$   | $10^{-4}$             | Maximum drag for the convective updraft vertical velocity                            | $Pa^{-1}$    |
| RKDN        | $3 \times 10^{-5}$    | $7 \times 10^{-5}$   | $5e-05$               | Minimum drag for the convective updraft vertical velocity                            | $Pa^{-1}$    |
| TENTR       | $2 \times 10^{-6}$    | $10^{-5}$            | $4 \times 10^{-6}$    | Minimum turbulent entrainment in the convective updraft                              | $Pa^{-1}$    |
| TENTRX      | $3 \times 10^{-5}$    | $1 \times 10^{-4}$   | $6 \times 10^{-5}$    | Maximum turbulent entrainment in the convective updraft                              | $Pa^{-1}$    |
| VVN         | -1                    | -5                   | -2                    | Critical convective updraft Vertical velocity for maximum entrainment and drag       | $Pa.s^{-1}$  |
| VVX         | -25                   | -50                  | -35                   | Critical convective updraft Vertical velocity for minimum entrainment and drag       | $Pa.s^{-1}$  |
| ECMNP       | $10^{-3}$             | $2 \times 10^4$      | $8 \times 10^3$       | Critical cloud thickness for precipitation in cloud model                            | m            |
| RELFCAPE    | 0.2                   | 10.0                 | 2.0                   | Parameter used in the convection scheme Convective Available                         | -            |
| FNEBC       | 0                     | 20                   | 10                    | Parameter for computing the convective cloud fraction                                | -            |
| GCVRE       | 0.1                   | 1                    | 1                     | Parameter for controlling organized fractional entrainment/detrainment               | -            |
| GCVTURB     | $10^{-5}$             | $2 \times 10^{-4}$   | $5 \times 10^{-5}$    | Parameter for controlling "stratiform" ice clouds in the presence of deep convection | -            |
| RLWINHF_ICE | 0.5                   | 1.0                  | 0.9                   | Ice cloud heterogeneity coefficient in the longwave spectrum                         | -            |
| RLWINHF_LIQ | 0.5                   | 1.0                  | 0.9                   | Liquid cloud heterogeneity coefficient in the longwave spectrum                      | -            |
| RSWINHF_ICE | 0.5                   | 1.0                  | 0.71                  | Ice cloud heterogeneity coefficient in the shortwave spectrum                        | -            |
| RSWINHF_LIQ | 0.5                   | 1.0                  | 0.71                  | Liquid cloud heterogeneity coefficient in the shortwave spectrum                     | -            |

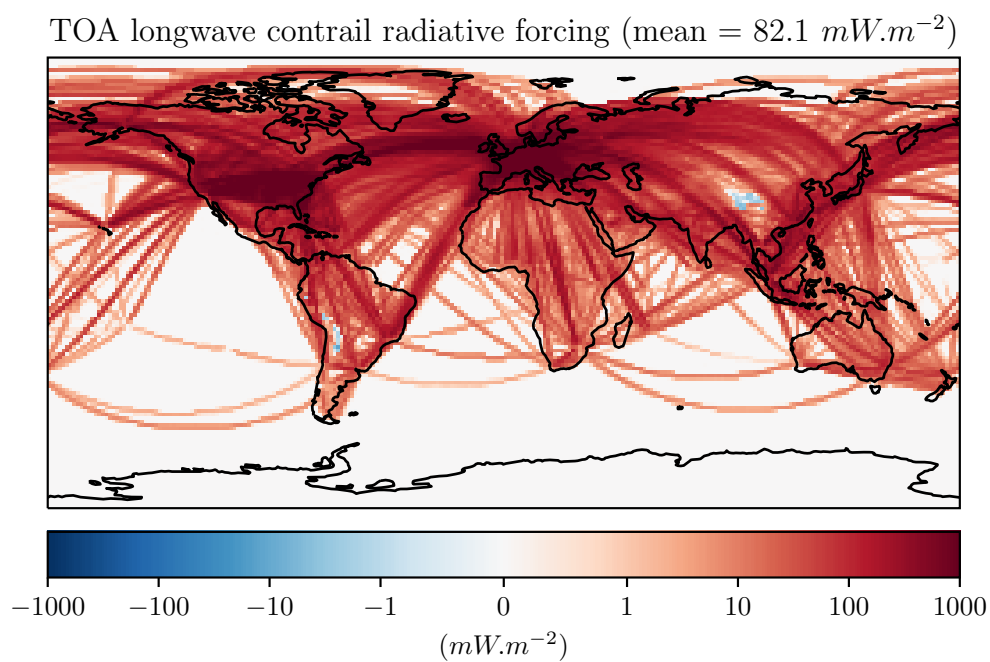

**Figure S1.** Annual mean of the short wave contrail radiative forcing at the top of atmosphere.

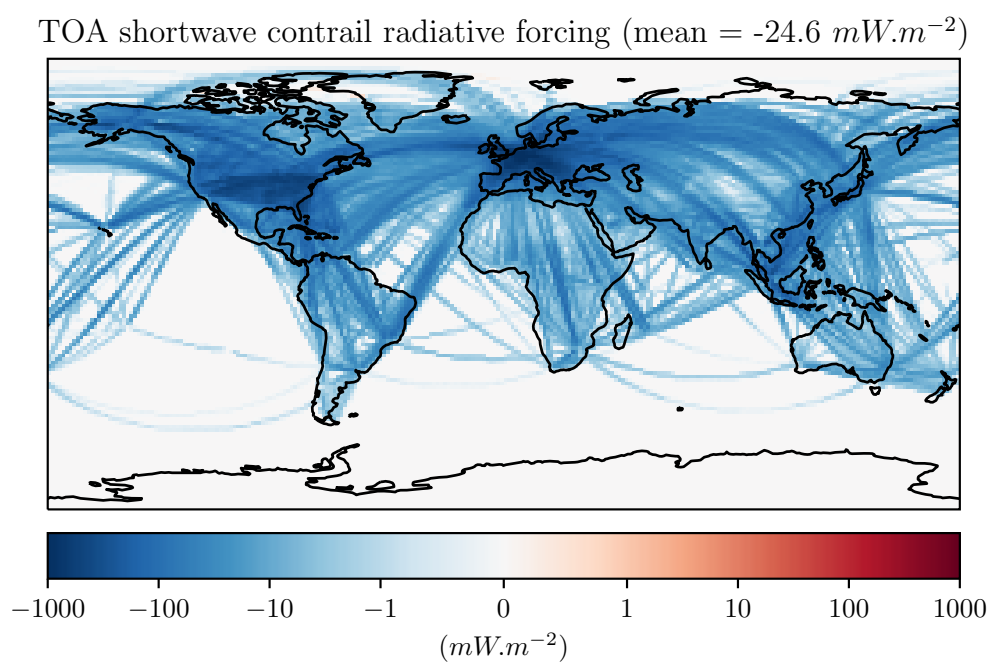

**Figure S2.** Annual mean of the short wave contrail radiative forcing at the top of atmosphere.

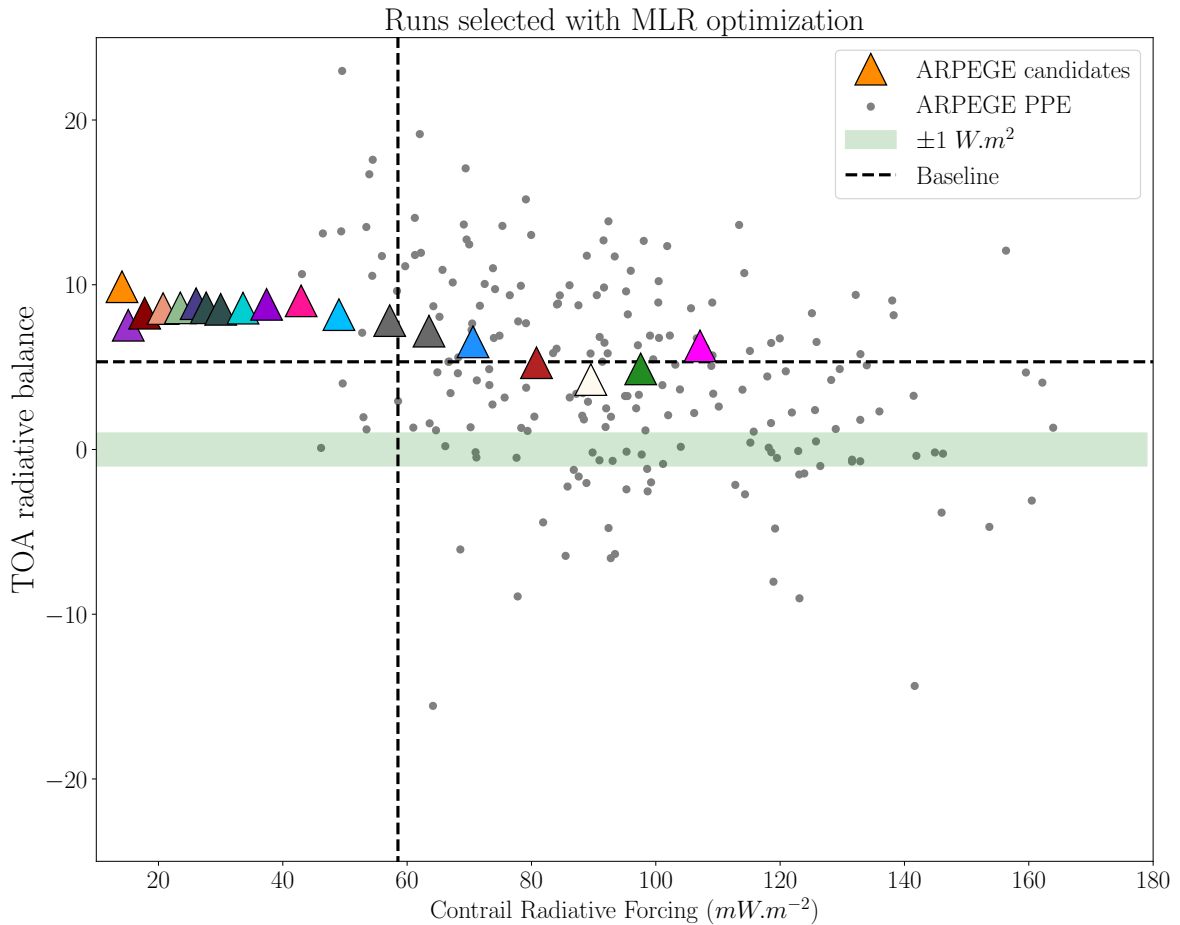

**Figure S3.** Top of atmosphere radiative budget of the ARPEGE-Climat runs calibrated with the nineteen optimal calibrations along the contrail radiative forcing range. Doing the modification on the existing cloud scheme, the top-of-atmosphere radiative budget of the model has become imbalanced. Since the study focuses on parametric uncertainty, a non-zero top-of-atmosphere radiative budget is permitted (Sexton et al., 2021; Collins et al., 2006). The tuning to solve this problem could be addressed in another study.
